# Supplementary material for: NT-ProBNP and mortality across the spectrum of glucose tolerance in the general US population
Source: PubMed Central journal article supplement (PMC9641859; doi:10.1186/s12933-022-01671-w), 2022-11-07
Supplement: 12933_2022_1671_MOESM1_ESM.pdf [file 12933_2022_1671_MOESM1_ESM.pdf]

**Supplementary Figure S1** Flow-chart of the studied participants.

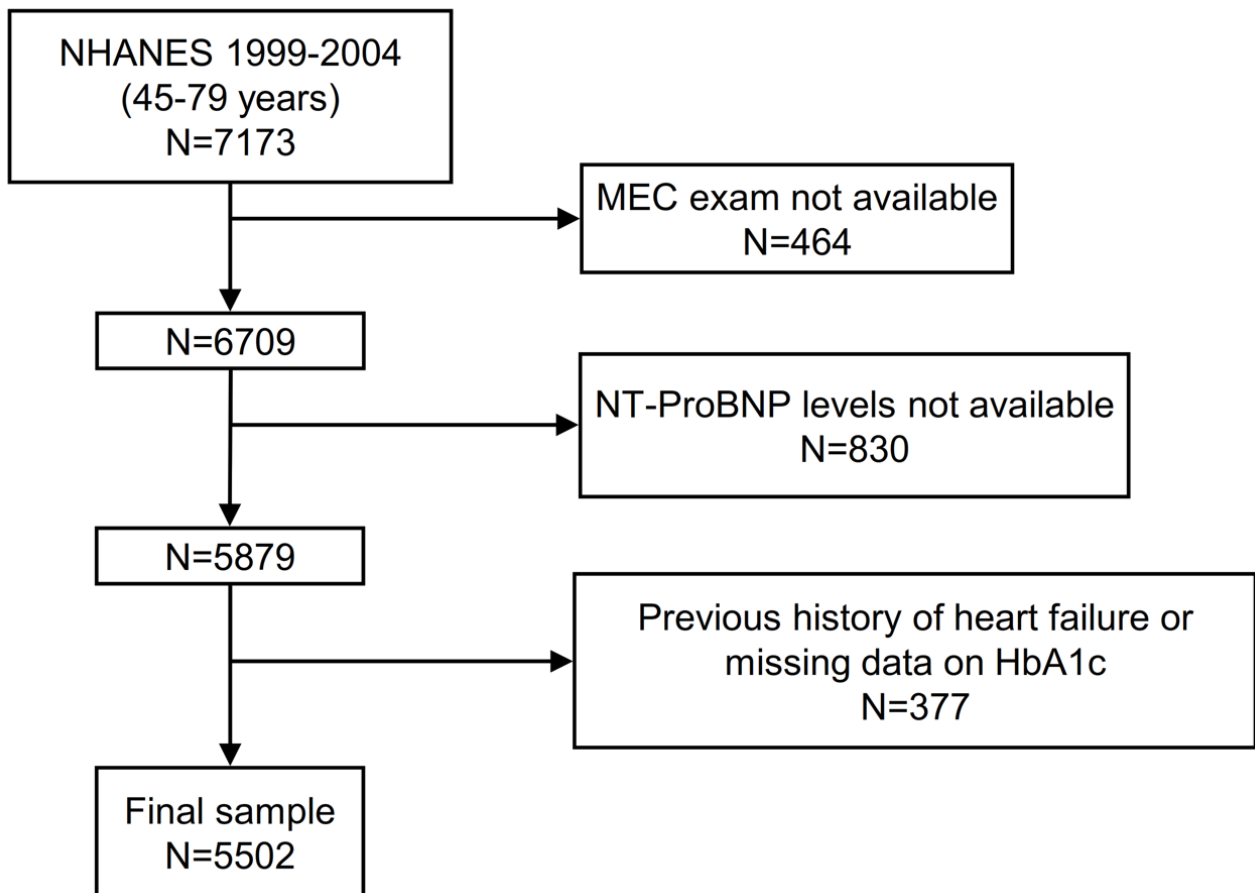

Abbreviations: NHANES, National Health and Nutrition Examination Survey, MEC, mobile examination center.

**Supplementary Figure S2** Cumulative incidence of cardiovascular and non-cardiovascular mortality in the whole population and according to glucose tolerance.

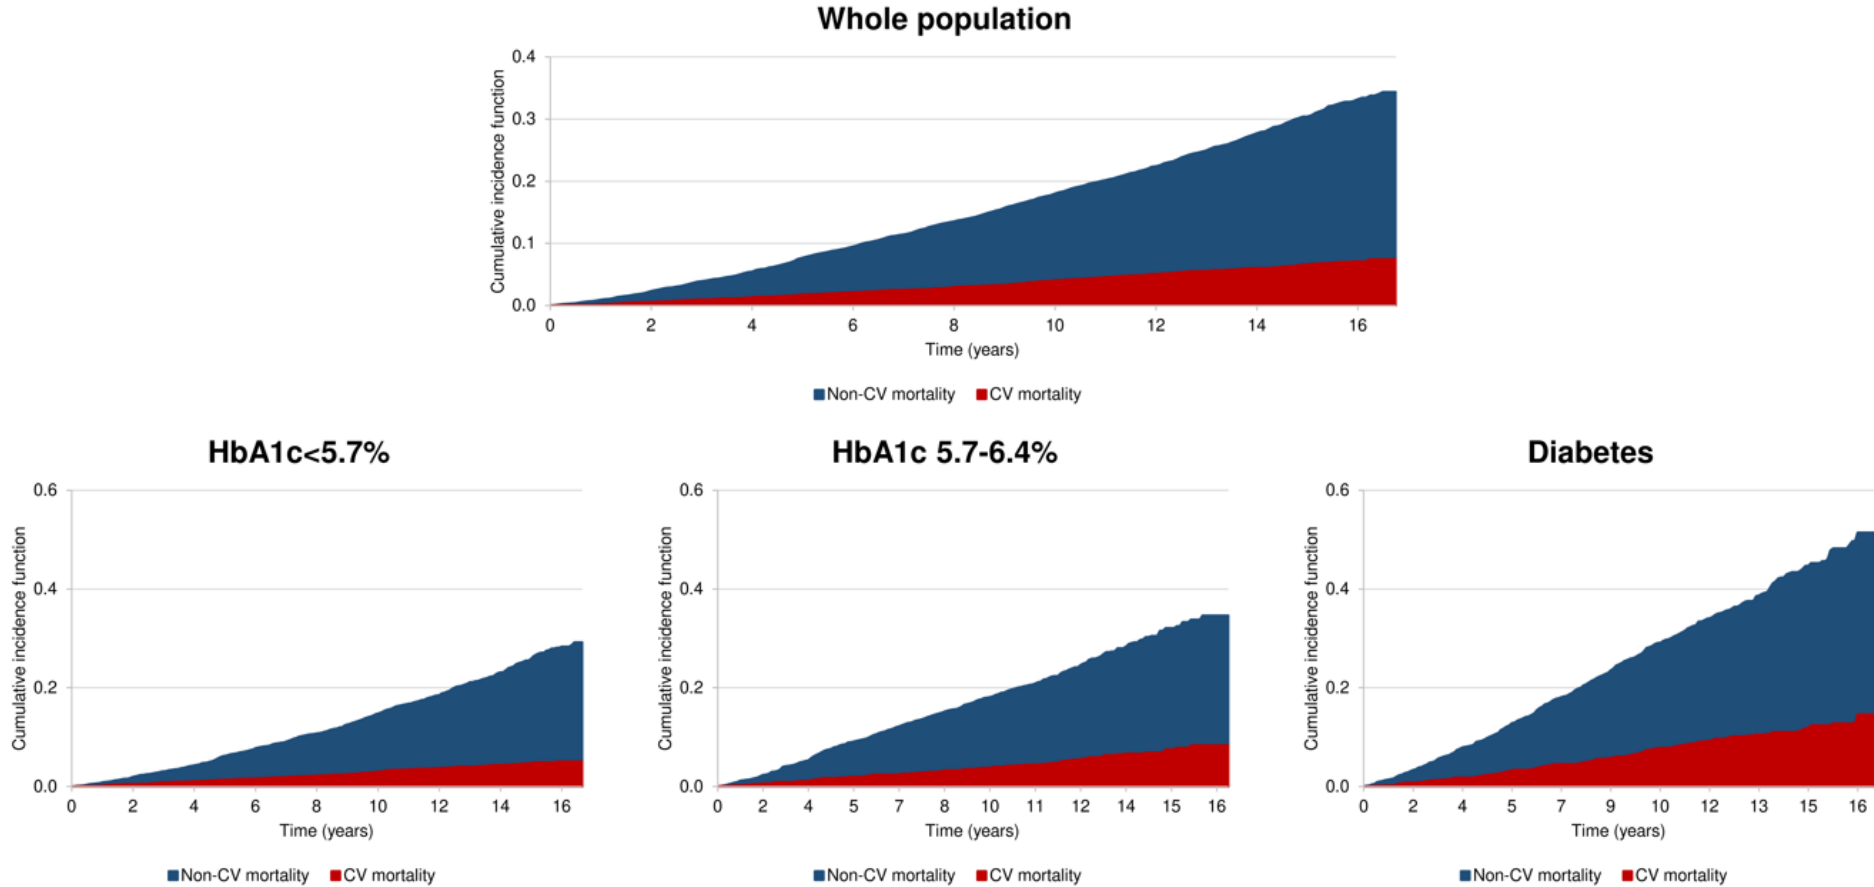

**Supplementary Table S1** Cox-proportional hazard model evaluating the association between NT-ProBNP levels and all-cause mortality according to baseline HbA1c levels by excluding patients with chronic kidney disease.

| Population       | NT-ProBNP (pg/ml) | All-cause mortality |           |         |
|------------------|-------------------|---------------------|-----------|---------|
|                  |                   | HR                  | 95% CI    | p-value |
| Whole population | <100              | 1.00                | Ref.      |         |
|                  | 100-299           | 1.37                | 1.12-1.67 | 0.003   |
|                  | ≥300              | 2.04                | 1.53-2.73 | <0.001  |
| HbA1c <5.7%      | <100              | 1.00                | Ref.      |         |
|                  | 100-299           | 1.31                | 0.98-1.73 | 0.065   |
|                  | ≥300              | 1.76                | 1.22-2.54 | 0.003   |
| HbA1c 5.7-6.4%   | <100              | 1.00                | Ref.      |         |
|                  | 100-299           | 1.39                | 0.93-2.09 | 0.103   |
|                  | ≥300              | 2.51                | 1.75-3.61 | <0.001  |
| Diabetes         | <100              | 1.00                | Ref.      |         |
|                  | 100-299           | 1.29                | 0.97-1.73 | 0.082   |
|                  | ≥300              | 2.11                | 1.44-3.11 | <0.001  |

Covariates included in model were age, sex, race-ethnicity, body mass index, education, cigarette smoke, total cholesterol, eGFR, blood pressure category, prevalent cardiovascular disease and alcohol consumption.

Abbreviations: HR: hazard ratio; CI, confidence interval; NT-ProBNP, N-terminal pro-B natriuretic peptide.
